# Supplementary material for: A theoretical perspective of the enhanced photocatalytic properties achieved by forming tetragonal ZnS/ZnSe hetero-bilayer
Source: Royal Society of Chemistry journal article supplement (doi:10.1039/c8cp00874d), 2018-01-01
Supplement: c8cp00874d1.pdf [file c8cp00874d1.pdf]

*Supporting Information*

Theoretical Perspective of the Enhanced  
Photocatalytic Properties by Forming Tetragonal  
ZnS/ZnSe Hetero-Bilayer

Jia Zhou<sup>1,2,\*</sup> and Xiaofeng Zhen<sup>1</sup>

<sup>1</sup>MIIT Key Laboratory of Critical Materials Technology for New Energy Conversion and Storage, School of Chemistry and Chemical Engineering, Harbin Institute of Technology, Harbin 150001, China

<sup>2</sup>School of Science, Harbin Institute of Technology, Shenzhen 518055, China

\*Corresponding Authors: Phone +86-451-8640-2522; e-mail: jiazhou@hit.edu.cn

**Typical INCARs for geometry optimization, as well as GW and BSE calculations:**

|                                                                                                                                                                                                                                  |                                                                                                                                                                                                                         |                                                                                                                                                                                                                                                                         |
|----------------------------------------------------------------------------------------------------------------------------------------------------------------------------------------------------------------------------------|-------------------------------------------------------------------------------------------------------------------------------------------------------------------------------------------------------------------------|-------------------------------------------------------------------------------------------------------------------------------------------------------------------------------------------------------------------------------------------------------------------------|
| <b>Geometry Optimization:</b><br>ALGO = Fast<br>NSIM = 4<br>LREAL = .FALSE.<br>NELM = 400<br>NSW = 400<br>ISIF = 3<br>IBRION = 2<br>ENCUT = 500.0<br>PREC = Accurate<br>EDIFF = 1E-5<br>EDIFFG = -0.01<br>ISMEAR = -5<br>IVDW=12 | <b>GW:</b><br>LWAVE = . TRUE.<br>ALGO = GW0<br>NOMEGA = 96<br>LREAL = .FALSE.<br>NELM = 1<br>NSW = 0<br>ENCUT = 500.0<br>ENCUTGW= 150.0<br>PREC = Accurate<br>EDIFF = 1E-5<br>ISMEAR = -5<br>NBANDS = 192<br>PRECFOCK=F | <b>BSE:</b><br>LWAVE = . TRUE.<br>ALGO = BSE<br>LBSE = .TRUE.<br>NOMEGA = 96<br>LREAL = .FALSE.<br>NELM = 1<br>NSW = 0<br>ENCUT = 500.0<br>ENCUTGW= 150.0<br>PREC = Accurate<br>EDIFF = 1E-5<br>ISMEAR = -5<br>NBANDS = 192<br>NBANDSO= 32<br>NBANDSV= 30<br>PRECFOCK=F |
|----------------------------------------------------------------------------------------------------------------------------------------------------------------------------------------------------------------------------------|-------------------------------------------------------------------------------------------------------------------------------------------------------------------------------------------------------------------------|-------------------------------------------------------------------------------------------------------------------------------------------------------------------------------------------------------------------------------------------------------------------------|

**POSCAR for t-ZnS/ZnSe BL:**

t-ZnS/ZnSe BL

1.0000000000000000

4.0086111083712943 0.0000000000000000 0.0000000000000000  
0.0000000000000000 4.0086111083712943 0.0000000000000000  
0.0000000000000000 0.0000000000000000 28.9515883000000009

Zn Se S

4 2 2

Direct

0.0000000000000000 0.0000000000000000 0.4118548059427786  
0.5000000000000000 0.5000000000000000 0.4118548059427786  
0.5000000000000000 0.5000000000000000 0.5881512416197066  
0.0000000000000000 0.0000000000000000 0.5881512416197066  
0.5000000000000000 0.0000000000000000 0.4640977029137209  
0.0000000000000000 0.5000000000000000 0.3591442952752337  
0.5000000000000000 0.0000000000000000 0.6341382376822048  
0.0000000000000000 0.5000000000000000 0.5426076690038701

**Pseudopotentials (version potpaw\_PBE.54):**

Standard PAW potentials were employed for geometry optimization, with valence configurations of  $3d^{10}4s^2$  for Zn,  $3s^23p^4$  for S, and  $4s^24p^4$  for Se.

PAW potentials designed for GW calculation were employed for GW calculation, with valence configurations of  $3d^{10}4s^2$  for Zn,  $3s^23p^4$  for S, and  $4s^24p^4$  for Se.

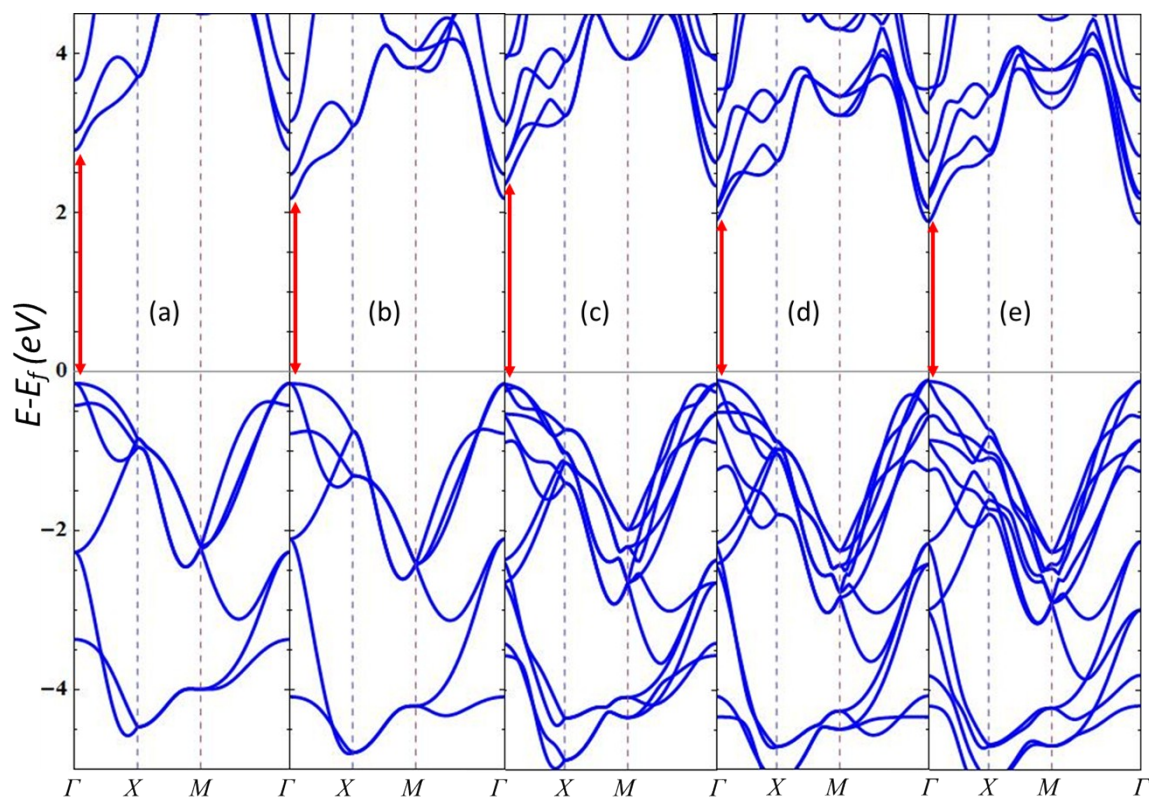

**Figure S1.** Band Structures of t-ZnS SL (a), t-ZnSe SL (b), t-ZnS BL (c), t-ZnSe BL (d), and t-ZnS/ZnSe BL (e), calculated by the PBE-D3.
